# Supplementary material
Source: Springer Nature journal article supplement (https://www.springermedizin.de/resource/supplementary/12916_2006_125_MOESM6_ESM.pdf/9599220)
Supplement: MOESM6 [file 9599220]

| 4.0 Investigate<br><i>Note: These steps assume appropriate laboratory capacity</i>                                                                                                                                                                                                                                                                                                                                                                                                                                           | 5.0 Respond                                                                                                                                                                                                                                                                                                                                                                                                                                                                                                                            | 6.0 Provide Feedback                                                                                                                                                                                                                                                                                                                                                                                                           | 7.0 Evaluate and Improve the System                                                                                                                                                                                                                                                                                                                                                                                                                                                                                                                                                                                                                                                                                                                                                                                                                                                                                                                             |
|------------------------------------------------------------------------------------------------------------------------------------------------------------------------------------------------------------------------------------------------------------------------------------------------------------------------------------------------------------------------------------------------------------------------------------------------------------------------------------------------------------------------------|----------------------------------------------------------------------------------------------------------------------------------------------------------------------------------------------------------------------------------------------------------------------------------------------------------------------------------------------------------------------------------------------------------------------------------------------------------------------------------------------------------------------------------------|--------------------------------------------------------------------------------------------------------------------------------------------------------------------------------------------------------------------------------------------------------------------------------------------------------------------------------------------------------------------------------------------------------------------------------|-----------------------------------------------------------------------------------------------------------------------------------------------------------------------------------------------------------------------------------------------------------------------------------------------------------------------------------------------------------------------------------------------------------------------------------------------------------------------------------------------------------------------------------------------------------------------------------------------------------------------------------------------------------------------------------------------------------------------------------------------------------------------------------------------------------------------------------------------------------------------------------------------------------------------------------------------------------------|
| <ul style="list-style-type: none"> <li>• Support case investigation activities such as informing the community of the problem, case finding, collecting of specimens and other activities</li> </ul>                                                                                                                                                                                                                                                                                                                         | <ul style="list-style-type: none"> <li>• Assist health authorities in selecting response activities</li> <li>• Participate in response activities</li> <li>• Mobilize community resources appropriate for response activity</li> </ul>                                                                                                                                                                                                                                                                                                 | <ul style="list-style-type: none"> <li>• Give feedback to community members about reported cases and prevention activities</li> </ul>                                                                                                                                                                                                                                                                                          | <ul style="list-style-type: none"> <li>• Decide if public health action took place as planned</li> <li>• Evaluate the community response to the public health action</li> </ul>                                                                                                                                                                                                                                                                                                                                                                                                                                                                                                                                                                                                                                                                                                                                                                                 |
| <ul style="list-style-type: none"> <li>• Take part in investigation of reported outbreaks</li> <li>• Collect, package, store and transport specimens for laboratory testing</li> <li>• Use investigation and laboratory results to confirm the outbreak</li> </ul>                                                                                                                                                                                                                                                           | <ul style="list-style-type: none"> <li>• Carry out community health education</li> <li>• Treat cases and contacts according to standard case management guidelines</li> <li>• Use appropriate infection control measures</li> <li>• Carry out public health response with the district level</li> <li>• Mobilize community involvement in the response</li> <li>• Advocate for resources</li> </ul>                                                                                                                                    | <ul style="list-style-type: none"> <li>• Give feedback to community members about outcome of reported cases and prevention activities</li> </ul>                                                                                                                                                                                                                                                                               | <ul style="list-style-type: none"> <li>• Monitor timeliness and completeness for reporting routine and case-based information to the district level</li> <li>• Evaluate routine detection and reporting of priority diseases and conditions</li> <li>• Evaluate preparedness for and timeliness of response activities</li> <li>• Evaluate appropriateness of case management</li> <li>• Take action to improve readiness for timely response to outbreaks</li> <li>• Maintain contact with community to maintain preparedness and prevention activities</li> </ul>                                                                                                                                                                                                                                                                                                                                                                                             |
| <ul style="list-style-type: none"> <li>• Process and record laboratory results</li> <li>• Provide the results to clinical staff and patients</li> </ul>                                                                                                                                                                                                                                                                                                                                                                      |                                                                                                                                                                                                                                                                                                                                                                                                                                                                                                                                        |                                                                                                                                                                                                                                                                                                                                                                                                                                | <ul style="list-style-type: none"> <li>• Monitor the interval between receipt of specimens and sending of results</li> <li>• Monitor quality of laboratory results</li> </ul>                                                                                                                                                                                                                                                                                                                                                                                                                                                                                                                                                                                                                                                                                                                                                                                   |
| <ul style="list-style-type: none"> <li>• Arrange and lead investigation of reported cases or outbreaks</li> <li>• Assist health facility in safe collection, packaging, storage and transport of laboratory specimens for confirmatory testing</li> <li>• Receive and interpret laboratory results</li> <li>• Decide if the reported outbreak is confirmed</li> <li>• Report the confirmed outbreak to the next level</li> </ul>                                                                                             | <ul style="list-style-type: none"> <li>• Select and implement appropriate public health response (for example, depending on the disease, plan to strengthen case management, conduct immunization activity, improve control and prevention activities)</li> <li>• Convene epidemic response committee and plan response</li> <li>• Conduct training for emergency activities</li> <li>• Plan timely community information and education activities</li> <li>• Alert nearby areas and districts about the confirmed outbreak</li> </ul> | <ul style="list-style-type: none"> <li>• Alert nearby areas and districts about outbreaks</li> <li>• Give health facilities regular periodic feedback about routine control and prevention activities</li> </ul>                                                                                                                                                                                                               | <ul style="list-style-type: none"> <li>• Monitor and evaluate program targets and indicators for measuring quality of the surveillance system</li> <li>• Monitor and evaluate timeliness and completeness of reporting from health facilities in the district</li> <li>• Monitor and evaluate timeliness of response to outbreaks</li> <li>• Monitor routine prevention activities and modify them as needed</li> </ul>                                                                                                                                                                                                                                                                                                                                                                                                                                                                                                                                         |
| <ul style="list-style-type: none"> <li>• Distribute specimen collection kits for special surveillance activities</li> </ul>                                                                                                                                                                                                                                                                                                                                                                                                  |                                                                                                                                                                                                                                                                                                                                                                                                                                                                                                                                        |                                                                                                                                                                                                                                                                                                                                                                                                                                |                                                                                                                                                                                                                                                                                                                                                                                                                                                                                                                                                                                                                                                                                                                                                                                                                                                                                                                                                                 |
| <ul style="list-style-type: none"> <li>• Alert laboratory and support its confirmation activities: supplies, transport media, logistics, transport of specimens</li> <li>• Support activities for investigating reported outbreaks: supplies, logistics, equipment, budget</li> <li>• Collaborate with international authorities as needed during investigations</li> <li>• Notify regional, international networks about confirmed outbreak</li> </ul>                                                                      | <ul style="list-style-type: none"> <li>• Set policies and procedures for responding to cases and outbreaks of priority diseases and conditions</li> <li>• Support epidemic response and preparedness activities</li> <li>• Report and disseminate results of outbreak response in bulletins, media, press releases and briefings</li> </ul>                                                                                                                                                                                            | <ul style="list-style-type: none"> <li>• Give feedback about response activities to each level</li> <li>• Give districts regular periodic feedback about routine control and prevention activities</li> <li>• Develop and periodically distribute regional bulletin for epidemiology and public health</li> </ul>                                                                                                              | <ul style="list-style-type: none"> <li>• Establish and disseminate policies and procedures for monitoring surveillance and outbreak response activities</li> <li>• Establish policies and practices for supervising surveillance and outbreak response activities</li> <li>• Evaluate detection and reporting activities, and make improvements as needed: <ul style="list-style-type: none"> <li>- Monitor and evaluate program targets and indicators for measuring quality of the surveillance system</li> <li>- Monitor and evaluate timeliness and completeness of reporting from intermediate levels</li> <li>- Monitor and evaluate timeliness of national support for outbreak response</li> <li>- Monitor and evaluate effectiveness of district-level outbreak response activities</li> </ul> </li> <li>• Monitor routine prevention activities and modify as needed</li> <li>• Monitor quality assurance for laboratories at lower levels</li> </ul> |
| <ul style="list-style-type: none"> <li>• Process specimens from investigation and send timely results as required to each level</li> <li>• Request additional specimens as needed</li> <li>• Take part in epidemic response team</li> </ul>                                                                                                                                                                                                                                                                                  |                                                                                                                                                                                                                                                                                                                                                                                                                                                                                                                                        |                                                                                                                                                                                                                                                                                                                                                                                                                                |                                                                                                                                                                                                                                                                                                                                                                                                                                                                                                                                                                                                                                                                                                                                                                                                                                                                                                                                                                 |
| <ul style="list-style-type: none"> <li>• Communicate recommendations for case investigation and laboratory confirmation</li> <li>• Mobilize resources for improving laboratory capacity and skills</li> <li>• Mobilize resources for investigation and confirmation as required, based on national level need and request</li> <li>• Provide laboratory training and equipment</li> <li>• Establish guidelines for preparedness and outbreak investigations</li> <li>• Participate in investigations as requested</li> </ul> | <ul style="list-style-type: none"> <li>• Support response activities (technical experts, guidelines)</li> <li>• Report to and inform international authorities about outbreak response</li> <li>• Calculate response indicators and report status to next level</li> <li>• Assist national level with epidemiological response and development of public health action</li> </ul>                                                                                                                                                      | <ul style="list-style-type: none"> <li>• Provide feedback for collaboration with national and regional levels</li> <li>• Inform countries about problems that may cross borders or have impact on regional levels</li> <li>• Report analysis results in regional and international bulletins for disease trends and patterns</li> <li>• Develop and distribute regional bulletin for epidemiology and public health</li> </ul> | <ul style="list-style-type: none"> <li>• Use reports from countries to measure their systems and advocate for improvements</li> </ul>                                                                                                                                                                                                                                                                                                                                                                                                                                                                                                                                                                                                                                                                                                                                                                                                                           |

Figure 4-b: Detect and Respond to Priority Infectious Diseases Matrix
